# Supplementary material for: Effects of aromatic substituents on the electronic structure and excited state energy levels of diketopyrrolopyrrole derivatives for singlet fission
Source: Royal Society of Chemistry journal article supplement (doi:10.1039/c8cp03216e), 2018-01-01
Supplement: c8cp03216e1.pdf [file c8cp03216e1.pdf]

*Electronic supplementary information for*

**Effects of Aromatic Substituents on Electronic Structure and Excited  
State Energy Levels of Diketopyrrolopyrrole Derivatives for Singlet  
Fission**

Li Shen, Zhaofeng Tang, Xuemin Wang, Heyuan Liu, Yanli Chen, Xiyou Li\*

College of science, China University of Petroleum (East China), Qingdao, 266580,  
China.

To whom correspondence should be addressed: E-mail: [xiyouli@upc.edu.cn](mailto:xiyouli@upc.edu.cn)

## 1. Functional and solvation effects on SF relevant excited states of DPP derivatives.

The vertical excitation energies of DPPs have been tested with different functionals to evaluate the effect of potential Charge-transfer state. These functionals include B3LYP, Cam-B3LYP,  $\omega$ B97XD and tuned-LC-BLYP. The range separating parameters  $\mu$  were tuned for each DPP derivatives (Table 1S) in vacuum condition with Quantum program optDFTw.<sup>1</sup> The vertical excitation energies are calculated based on the optimized  $S_0$  geometries B3LYP/6-311G\* level. The side chains on 2, 5-positions were replaced with methyl groups. The solvation effect was evaluated by polarizable continuum model (PCM).<sup>2</sup> The long-range-separated functionals Cam-B3LYP and  $\omega$ B97XD overestimate  $E(S_1)$  but underestimate  $E(T_1)$  (Table 2S). Compared to the tuned-LC-BLYP, the calculated results with functional B3LYP are more close to the experimental results. The three DPP derivatives with/without solvents give quite similar results both for  $E(S_1)$  and  $E(T_1)$ , the maximum error of which is  $\sim 0.15$  eV (Table 3S). These results show that the solvation effects are negligibly small for the calculations of vertical excitation energies  $E(S_1)$  and  $E(T_1)$ .

**Table 1S.** Tuned range separating parameters  $\mu^{\text{tuned}}$  [bohr<sup>-1</sup>] in LC-BLYP/6-311G\* for DPP derivatives.

| Molecule | PhDPP  | TDPP   | PhTDPP |
|----------|--------|--------|--------|
| $\mu$    | 0.1981 | 0.1994 | 0.1660 |

**Table 2S.** Vertical excitation energies [eV] of DPPs with different functionals based on  $S_0$  geometries.

|        |       | B3LYP | Cam-<br>B3LYP | $\omega$ B97XD | Tuned-LC-<br>BLYP | Exp.  |
|--------|-------|-------|---------------|----------------|-------------------|-------|
| PhDPP  | $S_1$ | 2.619 | 2.864         | 2.879          | 2.701             | 2.667 |
|        | $T_1$ | 1.205 | 0.927         | 1.018          | 1.203             |       |
| TDPP   | $S_1$ | 2.408 | 2.616         | 2.635          | 2.504             | 2.263 |
|        | $T_1$ | 1.007 | 0.648         | 0.760          | 1.012             |       |
| PhTDPP | $S_1$ | 2.162 | 2.408         | 2.443          | 2.256             | 2.081 |
|        | $T_1$ | 0.929 | 0.552         | 0.665          | 0.996             |       |

**Table 3S.** Solvation effects on vertical excitation energies [eV] of  $S_1$  and  $T_1$  states for DPPs.

|        | vacuum      | toluene     | dichloromethan<br>e | Exp   |
|--------|-------------|-------------|---------------------|-------|
| PhDPP  | 2.619/1.205 | 2.552/1.233 | 2.587/1.253         | 2.667 |
| TDPP   | 2.408/1.007 | 2.294/1.023 | 2.314/1.034         | 2.263 |
| PhTDPP | 2.162/0.929 | 2.044/0.942 | 2.056/0.952         | 2.081 |

**Table 4S.** Basis set effects on the energies [eV] of the  $S_1$  and  $T_1$  states of the three model compounds.

|        | 6-311G*     | 6-311G**    | cc-pVTZ     | Exp   |
|--------|-------------|-------------|-------------|-------|
| PhDPP  | 2.619/1.205 | 2.613/1.202 | 2.589/1.196 | 2.667 |
| TDPP   | 2.408/1.007 | 2.406/1.009 | 2.388/1.009 | 2.263 |
| PhTDPP | 2.162/0.929 | 2.157/0.929 | 2.144/0.931 | 2.081 |

## 2. Calculation procedure of multiple diradical character using the PUHF method

The multiple diradical characters ( $y_i$ ) are calculated by the spin-projected spin-unrestricted Hartree-Fock (PUHF) method as proposed by Yamaguchi.<sup>3,4</sup> This method is simple and reliable, and has been extensively used in evaluating diradical character of open-shell-character molecules by Nakano and co-workers.<sup>5</sup> The explicit formula is given by<sup>4</sup>

$$y_i = 1 - \frac{2T_i}{1 + T_i^2} \quad (1)$$

$$T_i = \frac{n_{HONO-i} - n_{LUNO-i}}{2} \quad (2)$$

Where  $n_i$  is the occupation number of the  $i$ -th natural orbitals ( $i=0, 1, \dots$ ). The HONO and LUNO correspond to the highest occupied natural orbital and lowest unoccupied natural orbital, respectively.

### 3. Molecular structures of nTz-DPPs.

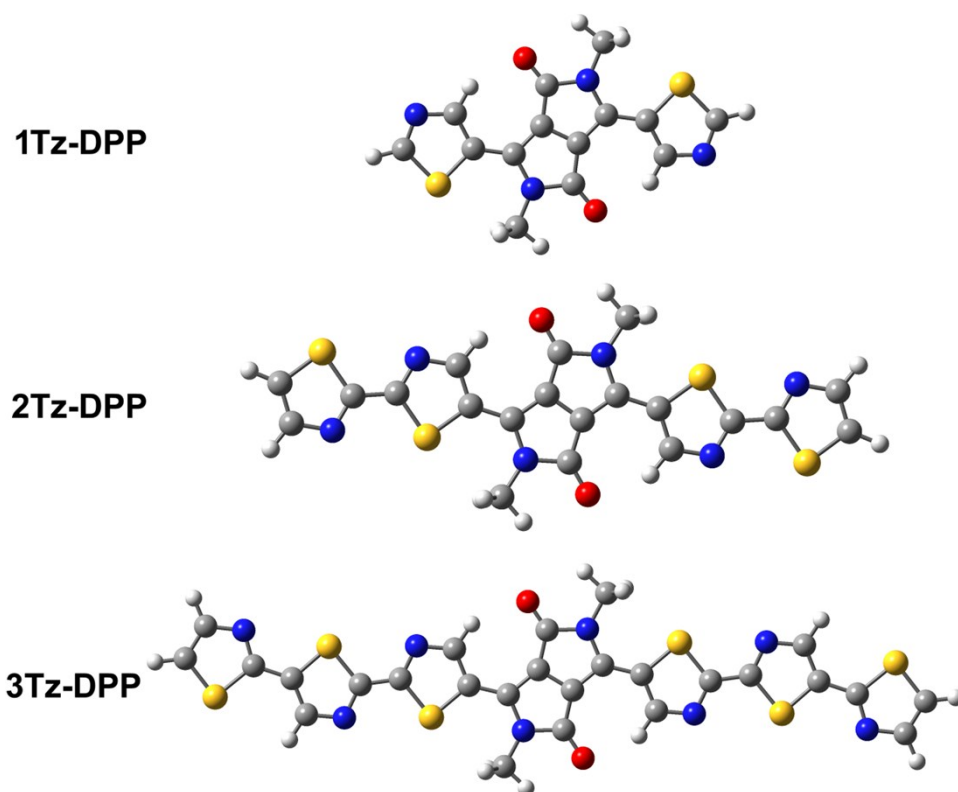

**Figure S1.** Molecular structures of nTz-DPPs.

**4. Electron density distributions of HOMO, LUMO for nF-DPP, nT-DPP and nTz-DPP.**

HOMO

LUMO

1F-DPP

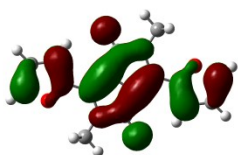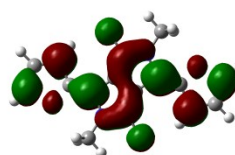

2F-DPP

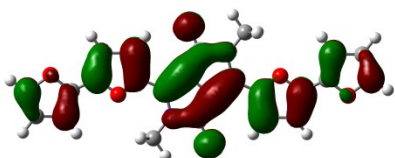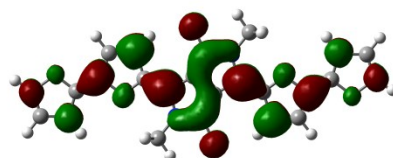

3F-DPP

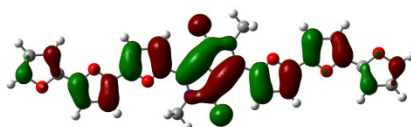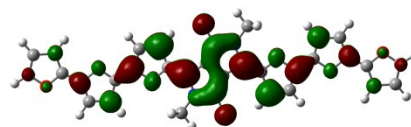

HOMO

LUMO

1T-DPP

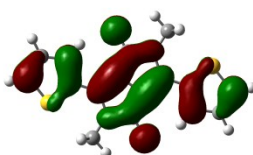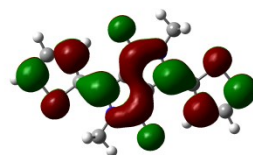

2T-DPP

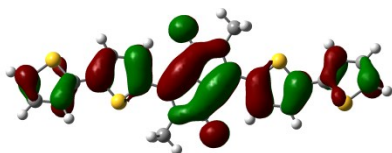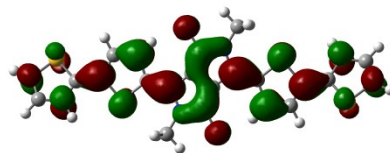

3T-DPP

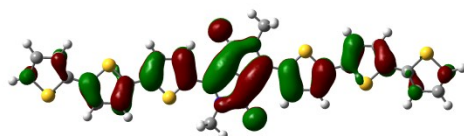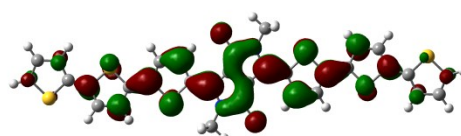

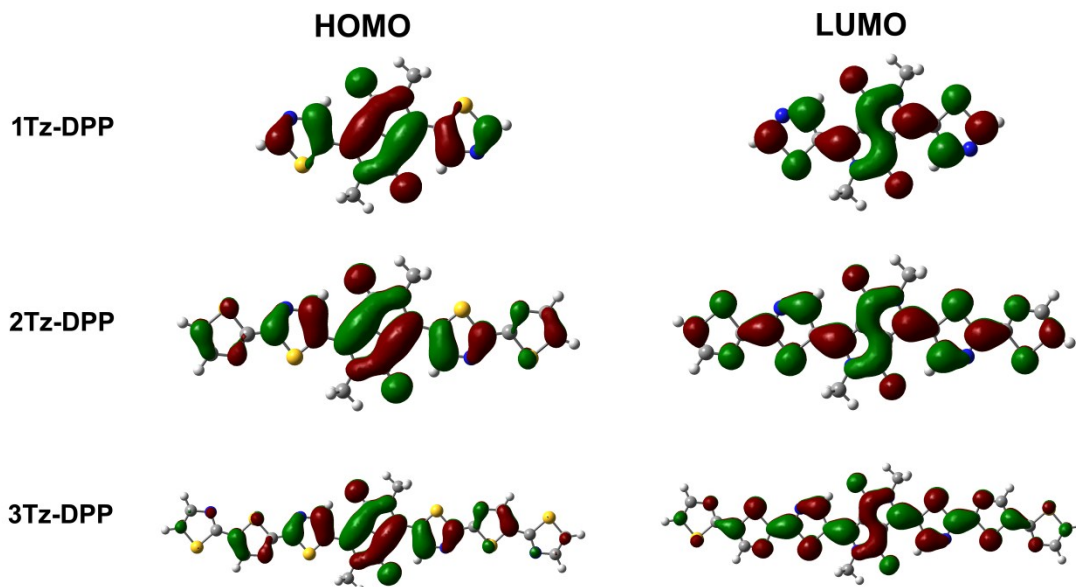

**Figure S2.** Electron density distributions of HOMO, LUMO for nF-DPP, nT-DPP, nTz-DPP.

5. The twist energy for T-T, F-T and T-T with respect to the inter-ring twist angle. The twist energy is calculated as relative energy with respect to the twist of 180° .

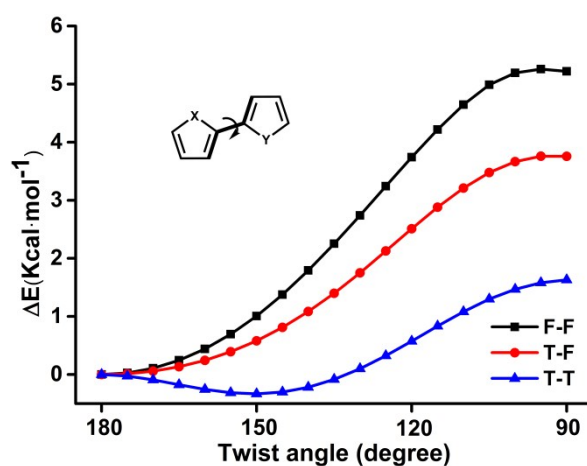

**Figure S3.** Calculated (B3LYP/6-311G\*) relative energy versus twist angle for F-F, F-T and T-T (F-F: X=Y=O; T-F: X=S, Y=O; T-T: X=Y=S).

5. Tetraradical character indicator  $\gamma_1$  and  $\gamma_1/\gamma_0$  of DPP derivatives in the second part.

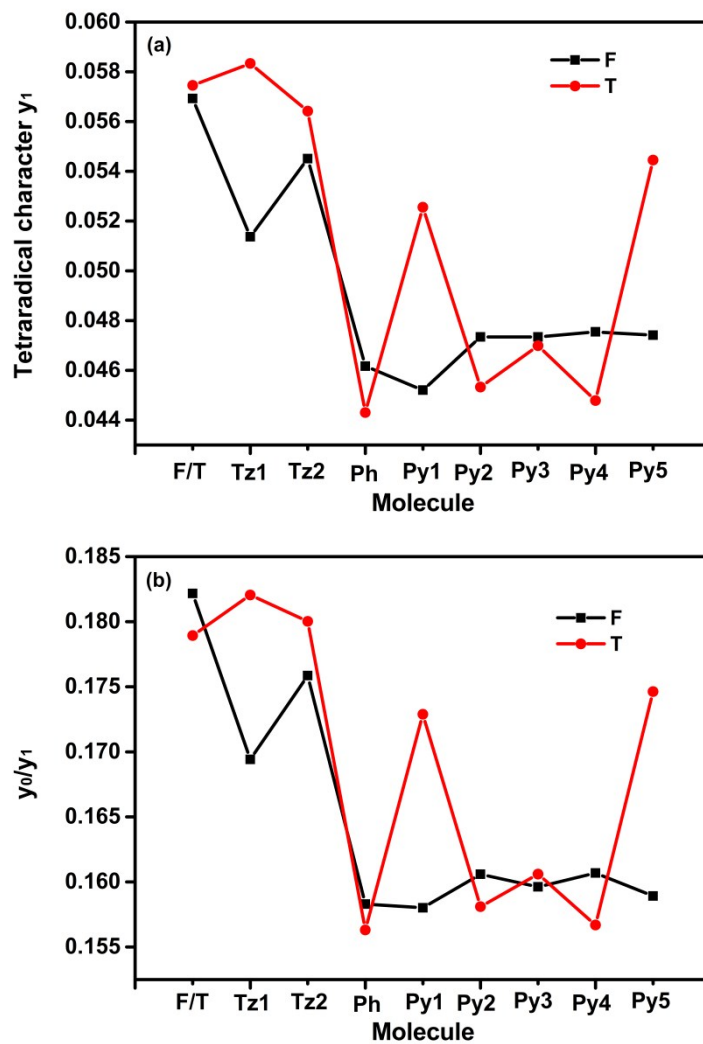

**Figure S4.** Tetraradical character indicator  $\gamma_1$  (a) and  $\gamma_1/\gamma_0$  (b) of DPP derivatives in category 2 with respect to the end-capped aromatic groups (Ar2).



**6. The frontier molecular orbital energies and diradical character indicator  $\gamma_0$  of 1F-DPP derivatives in the third part.**

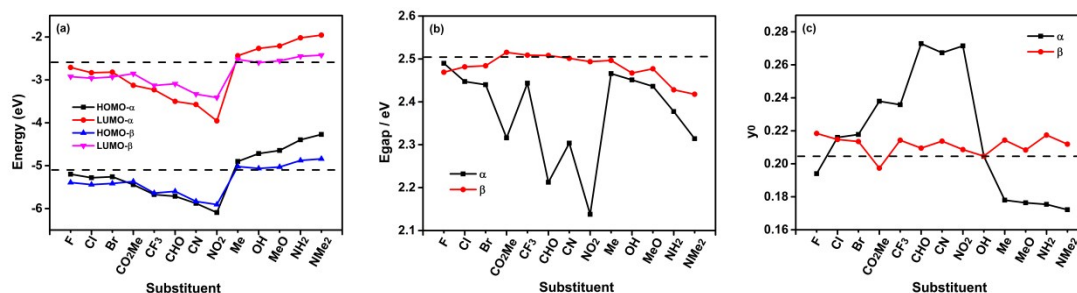

**Figure S5.** HOMO, LUMO energy levels (a) and corresponding E<sub>gap</sub> (b), as well as diradical character indicator  $\gamma_0$  (c) of 1F-DPP derivatives with respect to the introduced side-substituents and positions. (The solid lines are only guides for the eyes and the dash lines indicate the corresponding values of 1F-DPP).

**7. The calculated excitation energies E(S<sub>1</sub>), E(T<sub>1</sub>), E(T<sub>2</sub>) and energy changes of  $\Delta E_{SF}$ ,  $\Delta E_{TTA}$  (d) with respect of the introduced side-substituents.**

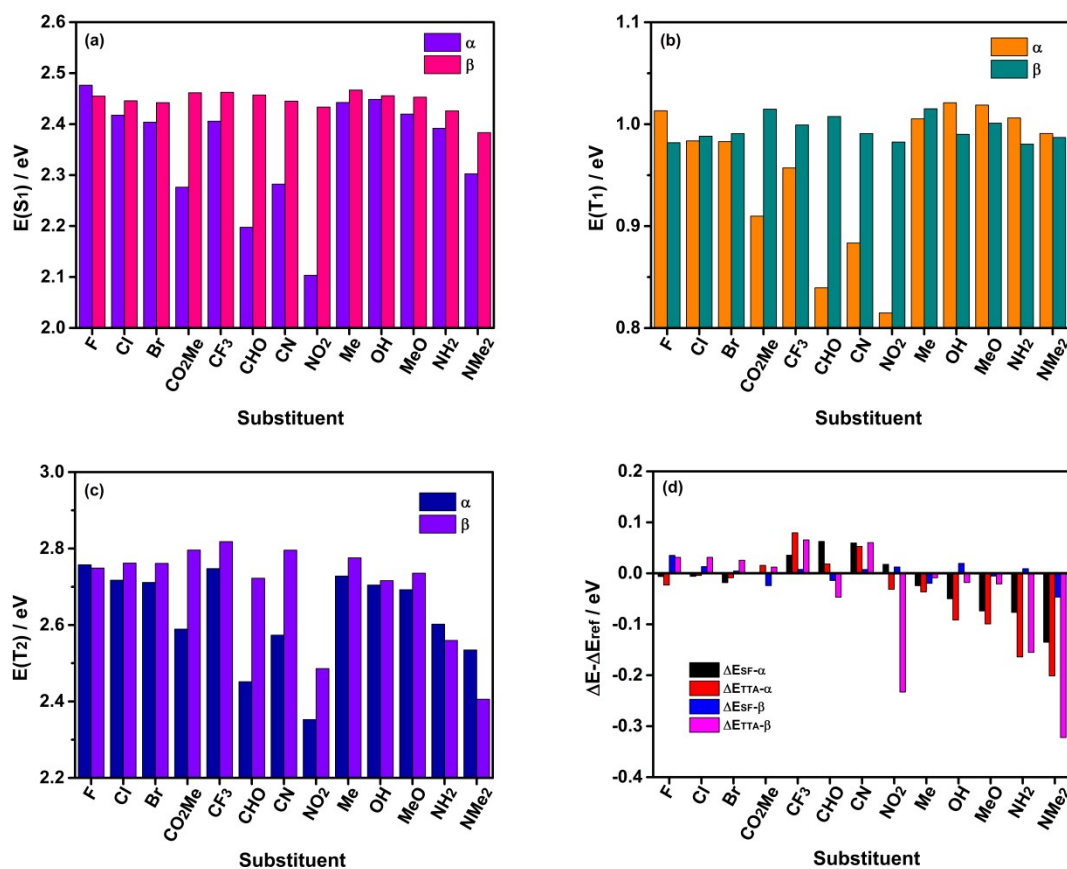

**Figure S6.** E(S<sub>1</sub>) (a), E(T<sub>1</sub>) (b) and E(T<sub>2</sub>) (c) of 1F-DPP derivatives with respect to the

introduced side-substituents. The energy changes of  $\Delta E_{SF}$ ,  $\Delta E_{TTA}$  (d) upon attaching side-substituents.  $\Delta E_{ref}$  denotes the corresponding  $\Delta E_{SF}$ ,  $\Delta E_{TTA}$  values of 1F-DPP.

## References

- (1) T. Lu, optDFTw program v1.0, webpage: <http://sobereva.com/346>.
- (2) G. Scalmani, M. J. Frisch, *J. Chem. Phys.*, 2010, **132**, 114110.
- (3) K. Yamaguchi, *Chem. Phys. Lett.* 1975, **33**, 330.
- (4) K. Yamaguchi, In *Self-Consistent Field: Theory and Applications*; Carbo, R., Klobukowski, M., Eds.; *Elsevier: Amsterdam, The Netherlands*, 1990; pp 727.
- (5) M. Nakano, *Chem. Rec.* 2017, **17**, 27.
